# Supplementary material for: RBM14 as a novel epigenetic-activated tumor oncogene is implicated in the reprogramming of glycolysis in lung cancer
Source: Springer Nature journal article supplement (doi:10.1186/s12957-023-02928-8), 2023-04-14

Fig. 1F

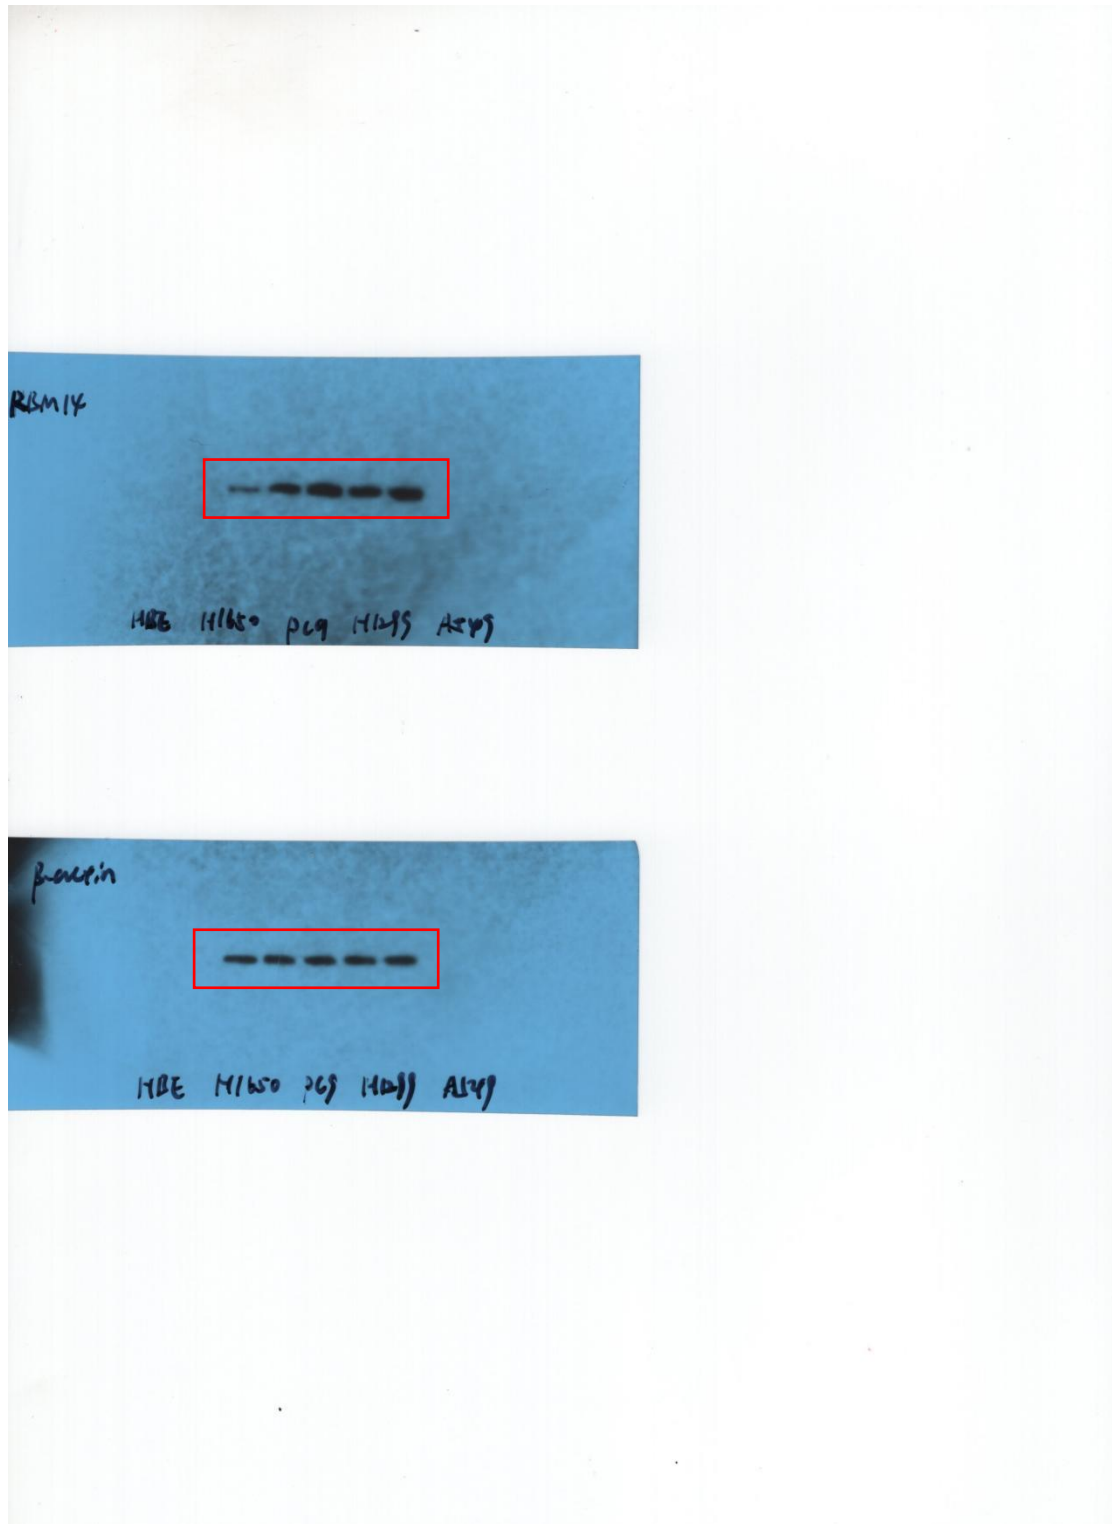

Fig. 4C\_PC9

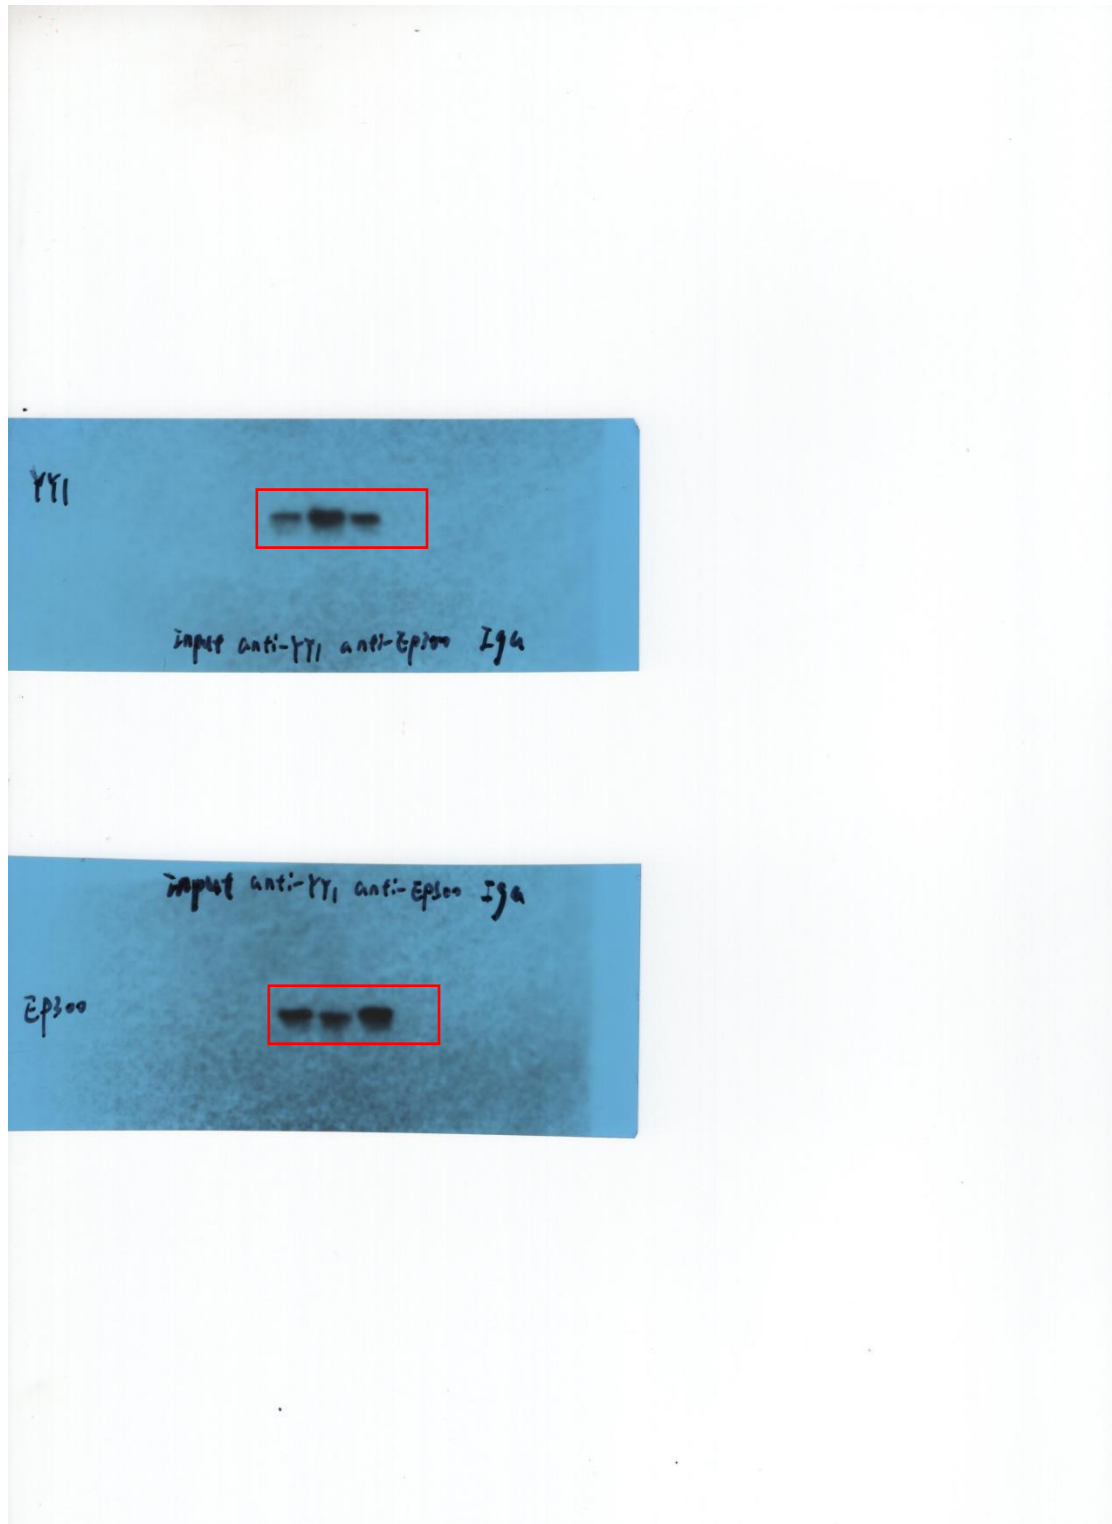

Fig. 4C\_A549

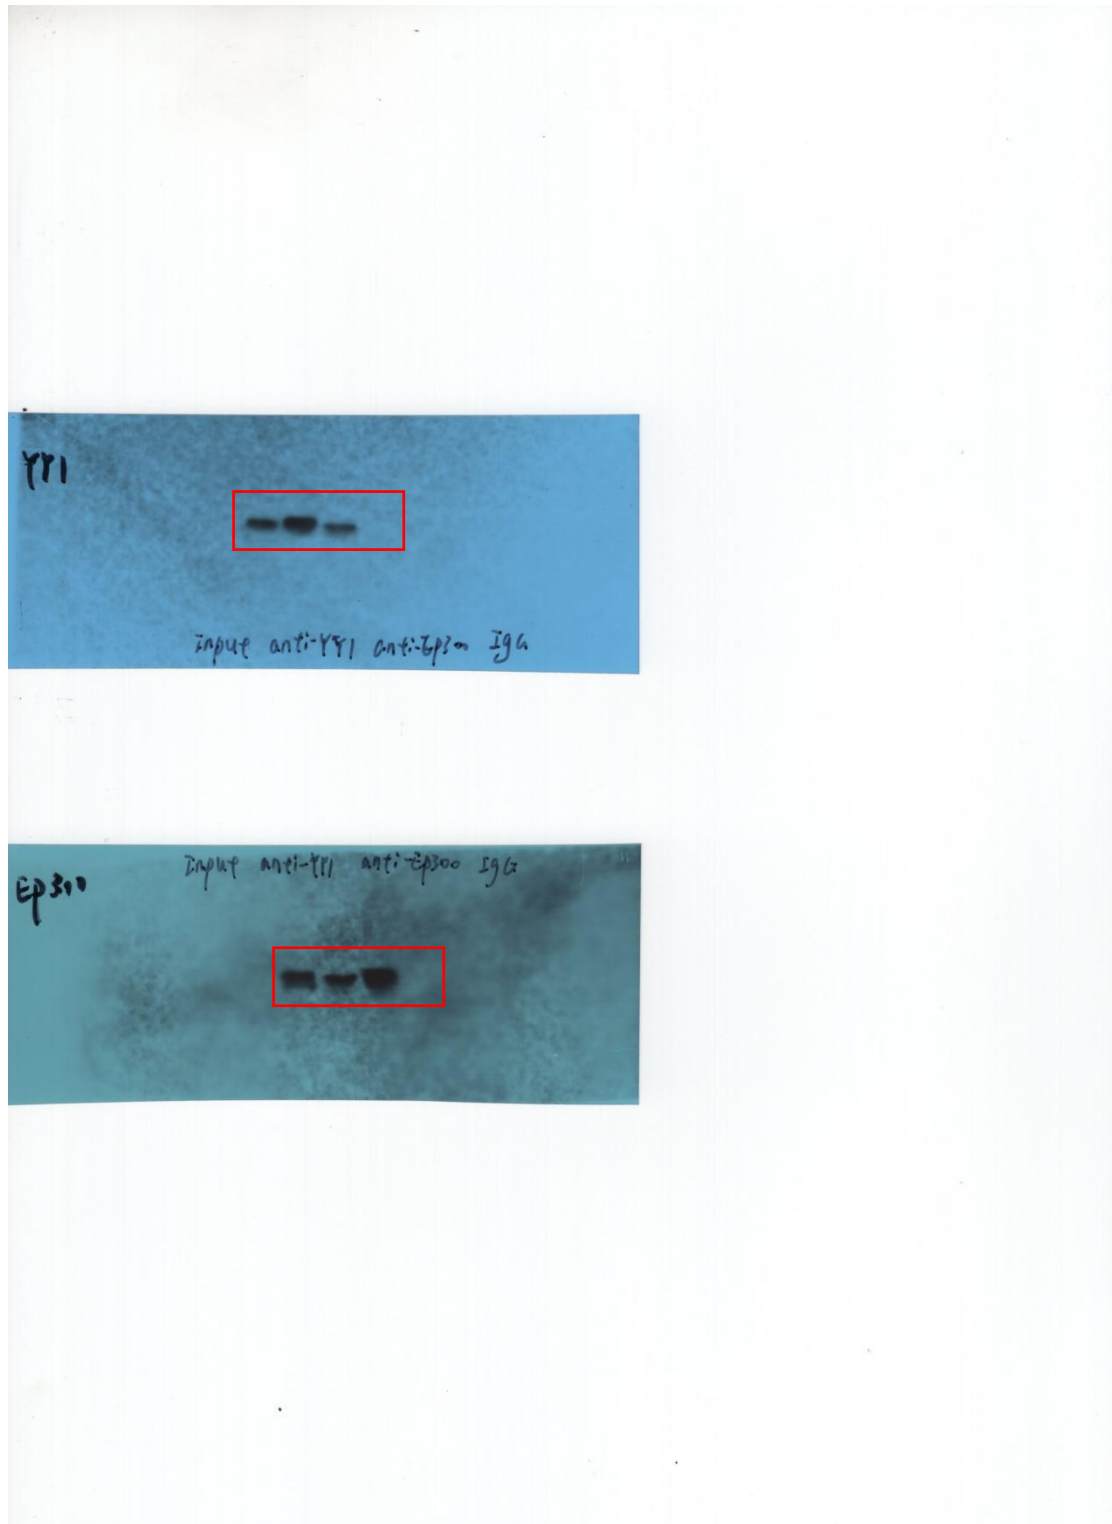

Fig.5A\_PC9

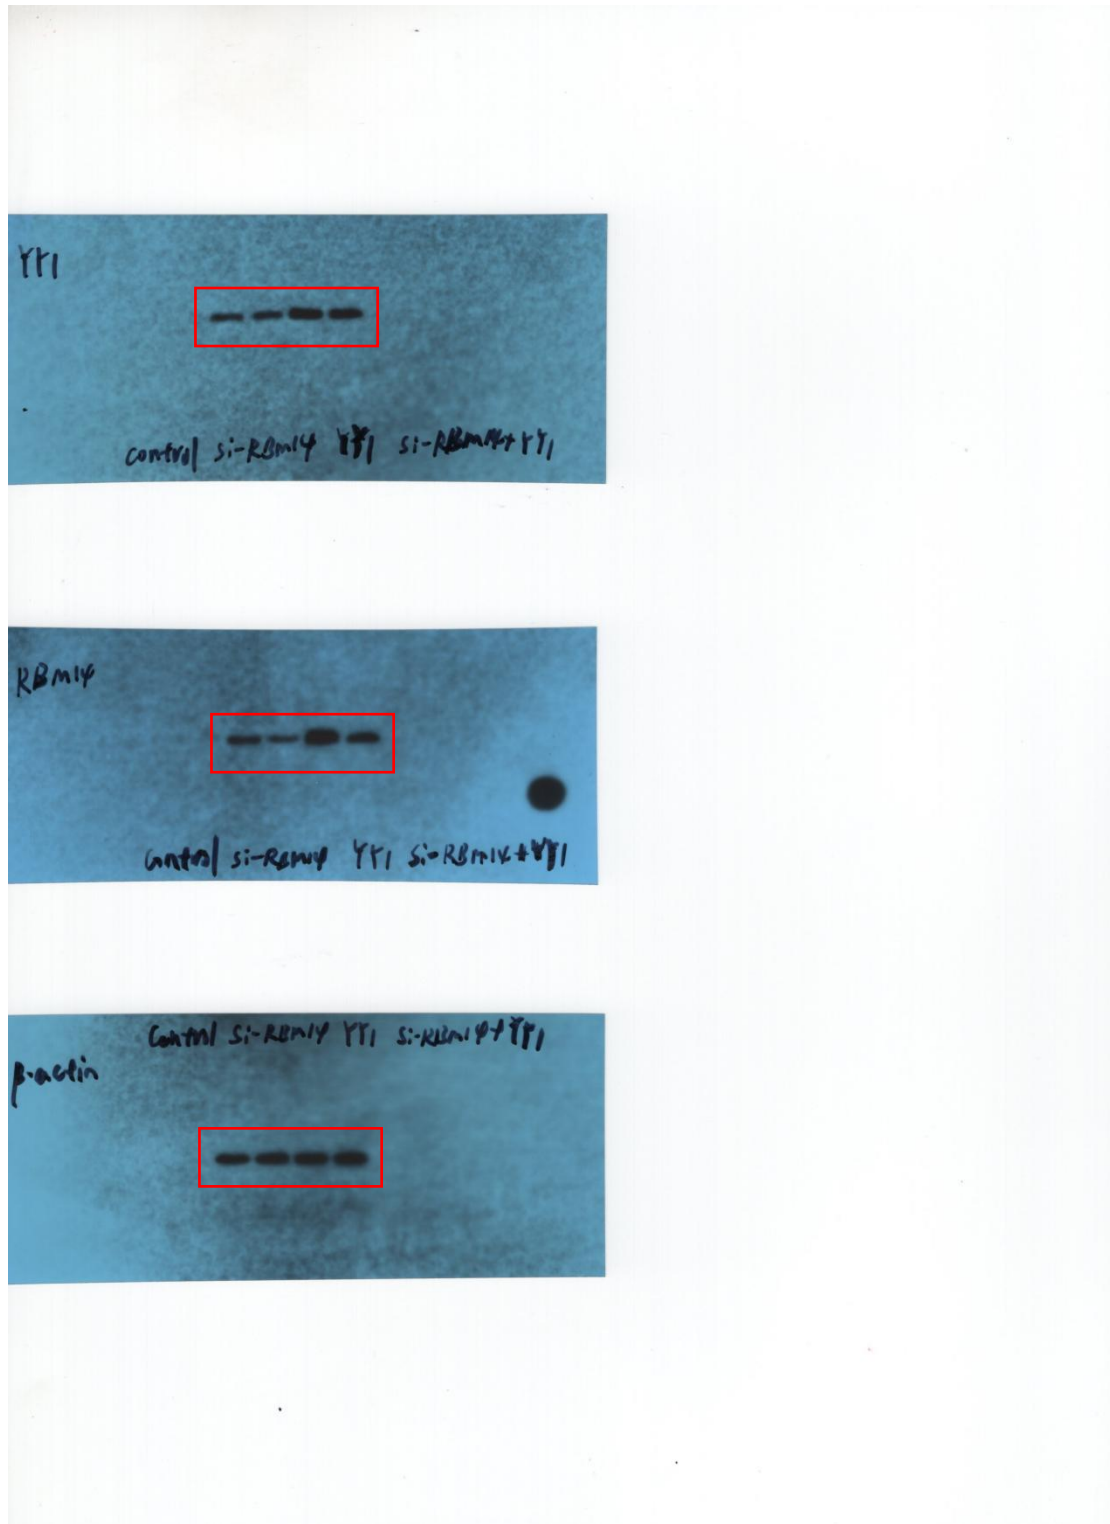

Fig.5A\_A549 (The group information is incorrectly marked. From left to right, control, si-RBM14, YY1, si-RBM14+YY1)

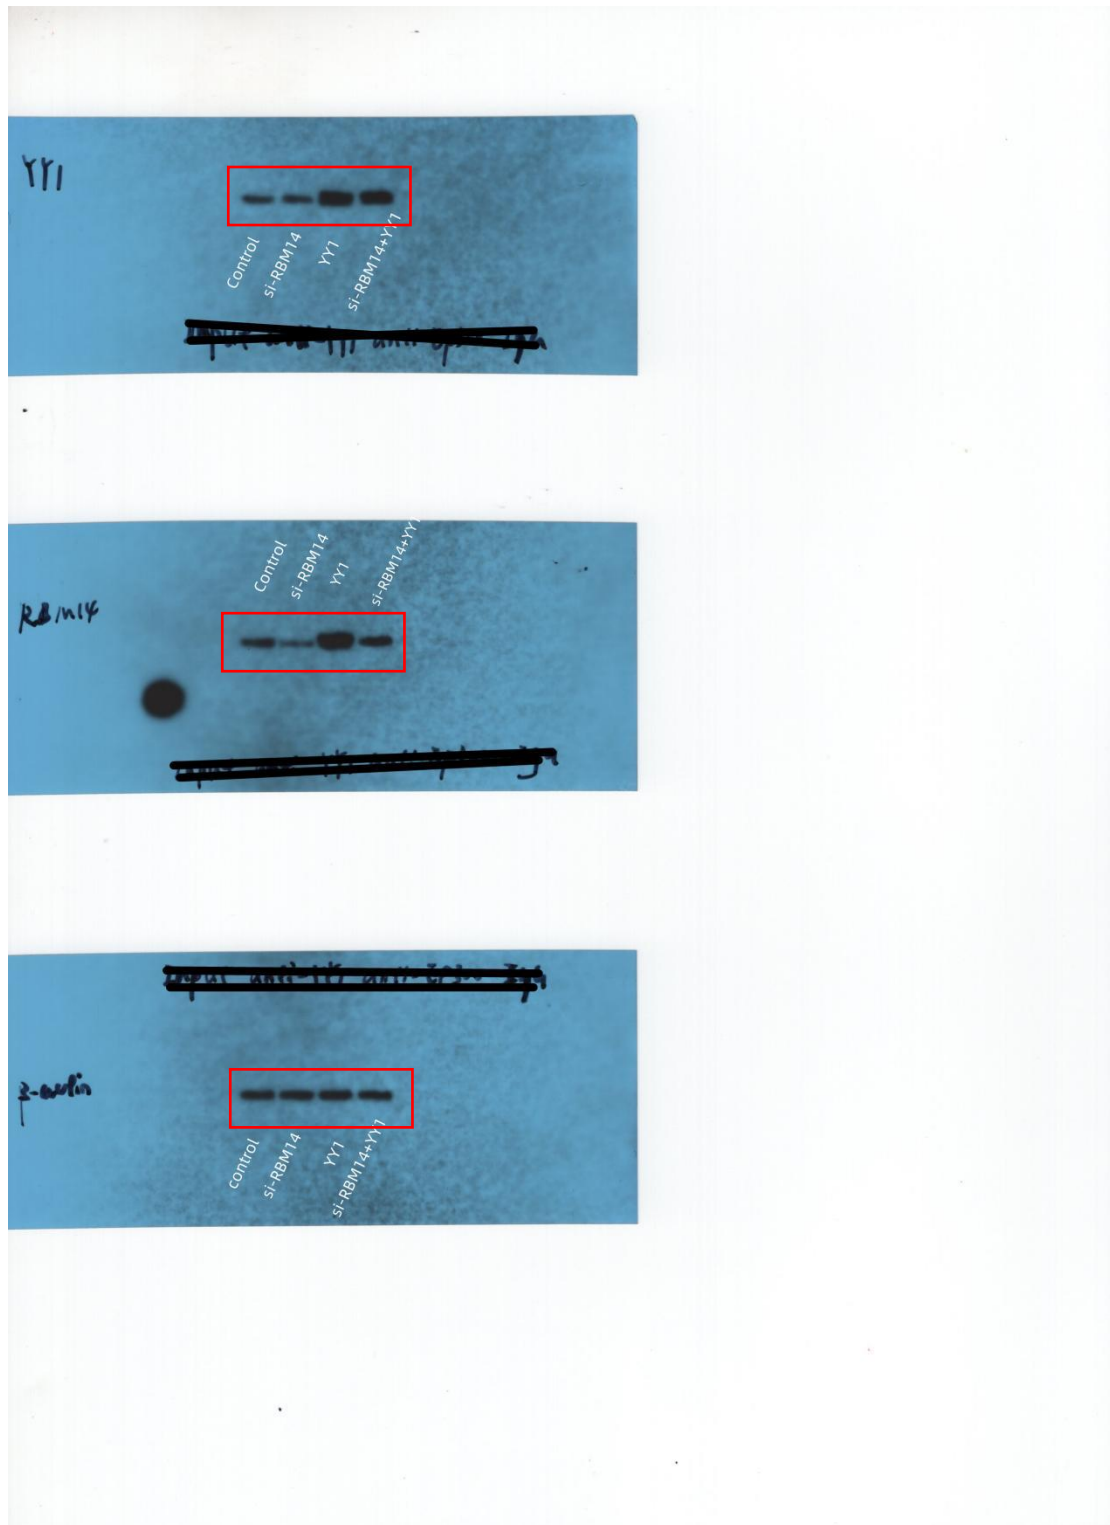

Supplement: MOESM2 [file 25244168]
